# Supplementary material
Source: PubMed Central journal article supplement (PMC8827621)
Supplement: ehp9406.smcontents.508.pdf [file ehp9406.smcontents.508.pdf]

**Note to readers with disabilities:** *EHP* strives to ensure that all journal content is accessible to all readers. However, some figures and Supplemental Material published in *EHP* articles may not conform to [508 standards](#) due to the complexity of the information being presented. If you need assistance accessing journal content, please contact [ehp508@niehs.nih.gov](mailto:ehp508@niehs.nih.gov). Our staff will work with you to assess and meet your accessibility needs within 3 working days.

### **Supplemental Material**

#### **Satellite-Based Long-Term Spatiotemporal Patterns of Surface Ozone Concentrations in China: 2005–2019**

Qingyang Zhu, Jianzhao Bi, Xiong Liu, Shenshen Li, Wenhao Wang, Yu Zhao, and Yang Liu

#### **Table of Contents**

**Table S1.** List of the input variables.

**Table S2.** Temporal trends of the TOAR monitoring data during 2005-2013.

**Figure S1. Study workflow** Abbreviations: SAO, Smithsonian Astrophysical Observatory; OMI, Ozone Monitoring Instrument; MERRA-2, the Modern-Era Retrospective analysis for Research and Applications, Version 2; MDA8, daily maximum 8-hour average.

**Figure S2. Distribution of the Tropospheric Ozone Assessment Report (TOAR) monitoring stations.** Red circle dots with black outlines represent the location of TOAR monitoring stations. Abbreviations: WLG, Mt. Waliguan; SDZ, Shangdianzi; LAN, Lin'an; LFS, Longfengshan; XGLL, Xianggelila; AKDL, Akedala; GCH, Gucheng, CMA. China Meteorological Administration; TOAR: Tropospheric Ozone Assessment Report.

**Figure S3. Comparison of model performance on the training dataset (2014-2019) with different OMI-derived partial column ozone (original model).** Left column: random CV; middle column: spatial CV; right column: temporal CV. Top row: model with a priori ozone profile L22-L24; second row (from top to bottom): model with a priori ozone profile L24; third row: model with L22-L24 retrievals; bottom row: the original model with retrieved ozone profile L24. The functions on the bottom-right corners are the regression functions between the predicted and observed monthly mean MDA8 ozone concentrations. Red dashed lines: the regression line between the predictions and observations; black solid lines: the  $x = y$  line; The color scale represents the density of the points. Abbreviations: MDA8, daily maximum 8-hour average; OMI, Ozone Monitoring Instrument.

**Figure S4. An example of the spatial artifacts in the predicted monthly mean MDA8 ozone concentrations in the YRD (April 2019).** Panel A was generated from the model with a priori ozone profile L22-L24; panel B was generated from the original model with OMI L24 retrieval. The green box represents YRD, and the yellow dashed line encircles an example of the spatial artifacts (the hard horizontal gap in predicted ozone concentrations). Abbreviations: MDA8, daily maximum 8-hour average; OMI, Ozone Monitoring Instrument; YRD, Yangtze River Delta.

**Figure S5. Season-specific cross-validation results for the original model with OMI L24 retrieval.** Left column: random CV; middle column: spatial CV; right column: temporal CV. Top row: spring (March-April-May); second row (from top to bottom): summer (June-July-August); third row: fall (September, October, November); bottom row: winter (December-January-February). The functions on the bottom-right corners are the regression functions between the predicted and observed MDA8 ozone concentrations. Red dashed lines: the regression line between the predictions and observations; black solid lines: the  $x = y$  line; The color scale represents the density of the points. Abbreviations: MDA8, daily maximum 8-hour average; OMI, Ozone Monitoring Instrument.

**Figure S6. Comparison of model performance in rural/urban areas using OMI L24 retrieval.** Left column: random CV; middle column: spatial CV; right column: temporal CV. Upper row: model performance at rural CNEMC sites; Lower row: model performance in urban CNEMC sites. The functions on the bottom-right corners are the regression functions between the predicted and observed MDA8 ozone concentrations. Red dashed lines: the regression line between the predictions and observations; black solid lines: the  $x = y$  line; The color scale represents the density of the points. Abbreviations: CNEMC, China National Environmental Monitoring Centre; MDA8, daily maximum 8-hour average; OMI, Ozone Monitoring Instrument.

**Figure S7. Trend comparison between model predictions and the TOAR historical monitoring data (original model using OMI L24 retrieval).** Each row represents a TOAR monitoring site. Blue lines: the observed monthly mean MDA8 ozone concentrations. Orange lines: the model predicted monthly MDA8 ozone concentrations. Abbreviations: MDA8, daily maximum 8-hour average; OMI, Ozone Monitoring Instrument. TOAR, Tropospheric Ozone Assessment Report.

**Figure S8. Trend comparison between model predictions and the TOAR historical monitoring data (model trained with OMI L24 retrieval + MODIS FRP).** Each row represents a TOAR monitoring site. Blue lines: the observed monthly mean MDA8 ozone concentrations. Orange lines: the model predicted monthly MDA8 ozone concentrations. Abbreviations: FRP, fire radiative power; MDA8, daily maximum 8-hour average; MODIS, Moderate Resolution Imaging Spectrometer; OMI, Ozone Monitoring Instrument. TOAR, Tropospheric Ozone Assessment Report.

**Figure S9. Raw correlation between OMPROFOZ L24 partial column ozone and ground-level monitoring data.** The function on the upper-left corner is the regression function between the OMPROFOZ L24 partial column ozone and the CNEMC surface MDA8 ozone concentrations. Red dashed line: the regression line as the regression function represents; black solid line: the  $x = y$  line; The color scale represents the density of the points. Abbreviations: CNEMC, China National Environmental Monitoring Centre; MDA8, daily maximum 8-hour average.

**Figure S10. model performance without the OMI L24 retrieval.** Left panel: random CV; middle panel: spatial CV; right panel: temporal CV. The functions on the bottom-right corners are the regression functions between the predicted and observed monthly mean MDA8 ozone concentrations. Red dashed lines: the regression line between the predictions and observations; black solid lines: the  $x = y$  line; The color scale represents the density of the points. Abbreviations: CV, cross-validation; MDA8, daily maximum 8-hour average.

**Figure S11. Trend comparison between model predictions and the TOAR historical monitoring data (OMI-excluded model).** Each row represents a TOAR monitoring site. Blue lines: the observed monthly mean MDA8 ozone concentrations. Orange lines: the model predicted monthly MDA8 ozone concentrations. Abbreviations: MDA8, daily maximum 8-hour average; OMI, Ozone Monitoring Instrument. TOAR, Tropospheric Ozone Assessment Report.

**Figure S12. The importance ranking of the input predictors.** Orange bars in the left panel: the spring-excluded (all months except for March-April-May) model; blue bars in the right panel: the spring (March-April-May) model. The red downward arrows denoted that the relative ranking of the variable dropped in the spring model compared to other seasons; the blue upward arrows denoted that the relative ranking of a variable increased in spring. Variables' importance was generated with a permutation method.

**Figure S13. The OMI tropospheric column NO<sub>2</sub> concentrations in the Yangtze River Delta region (August 2019, the marked regions were consistent to Fig. 5)** The boxes represent some YRD cities and their surrounding area; A: Bengbu and Huainan City; B: Nanjing Metropolitan Area; C: Anqing City; D: Quzhou and Jinhua City. Abbreviations: MDA8, daily maximum 8-hour average.

**Figure S14. The predicted long-term trend of summertime (June-July-August) mean MDA8 ozone concentrations over 2005-2019.** The dots represented the predicted summertime mean MDA8 ozone concentrations; red lines are the linear smooth functions; P indicates the p-value of the linear trends. Abbreviations: MDA8, daily maximum 8-hour average; NCP: the North China Plain; PRD: the Pearl River Delta; YRD: the Yangtze River Delta.

**Figure S15. The predicted long-term trend of summertime (June-July-August) mean MDA8 ozone concentrations over 2005-2013.** The dots represented the predicted summertime mean MDA8 ozone concentrations; red lines are the linear smooth functions; P indicates the p-value of the linear trends. Abbreviations: MDA8, daily maximum 8-hour average; NCP: the North China Plain; PRD: the Pearl River Delta; YRD: the Yangtze River Delta.

**Figure S16. The predicted long-term trend of springtime (March-April-May) mean MDA8 ozone concentrations over 2005-2019.** The dots represented the predicted springtime mean MDA8 ozone concentrations; red lines are the linear smooth functions; P indicates the p-value of the linear trends. Abbreviations: MDA8, daily maximum 8-hour average; NCP: the North China Plain; PRD: the Pearl River Delta; YRD: the Yangtze River Delta.

**Figure S17. The predicted long-term trend of springtime (March-April-May) mean MDA8 ozone concentrations over 2005-2013.** The dots represented the predicted springtime mean MDA8 ozone concentrations; red lines are the linear smooth functions; P indicates the p-value of the linear trends. Abbreviations: MDA8, daily maximum 8-hour average; NCP: the North China Plain; PRD: the Pearl River Delta; YRD: the Yangtze River Delta.

**Figure S18. The comparison of the mean ozone season (March-November) MDA8 ozone concentrations between our model predictions and the CNEMC monitoring data over 2014-2019.** The blue columns on the left represent the CNEMC observations; the orange column on the right represents our model predictions. The height of the columns and the error bars represent the mean MDA8 ozone concentrations and the standard error. Abbreviations: CNEMC, China National Environmental Monitoring Centre; MDA8, daily maximum 8-hour average; NCP: the North China Plain; PRD: the Pearl River Delta; YRD: the Yangtze River Delta.

**Figure S19. The comparison of the summertime (June-July-August) mean MDA8 ozone concentrations between our model predictions and the CNEMC monitoring data over 2014-2019.** The blue columns on the left represent the CNEMC observations; the orange column on the right represents our model predictions. The height of the columns and the error bars represent the mean MDA8 ozone concentrations and the standard error. Abbreviations: CNEMC, China National Environmental Monitoring Centre; MDA8, daily maximum 8-hour average; NCP: the North China Plain; PRD: the Pearl River Delta; YRD: the Yangtze River Delta.

**Figure S20. Locations of the Shandong Peninsula and Central East China.** The solid line encircles the Shandong Peninsula, while the dashed line encircles the Central East China area.
